# Supplementary material for: Maternal Relationships among Ancient and Modern Southern African Sheep: Newly Discovered Mitochondrial Haplogroups
Source: Biology (Basel). 2022 Mar 11;11(3):428. doi: 10.3390/biology11030428 (PMC8944976; doi:10.3390/biology11030428)
Supplement: Supplementary file 1 [file biology-11-00428-s001.zip]

Archive with 4 entries (4 files):
- Supplementary Materials Figure S1.pdf
- Supplementary Materials Figure S2.pdf
- Supplementary Materials Figure S3.pdf
- Supplementary Materials Table S1.xlsx
