# Supplementary material for: Maternal Relationships among Ancient and Modern Southern African Sheep: Newly Discovered Mitochondrial Haplogroups
Source: Biology (Basel). 2022 Mar 11;11(3):428. doi: 10.3390/biology11030428 (PMC8944976; doi:10.3390/biology11030428)
Supplement: Supplementary file 1 [file biology-11-00428-s001.zip › Supplementary Materials Table S1.xlsx]

## Sheet: Modern Sheep
Sample	Breed	%coverage	Average_depth	Haplogroup
DAM001	Damara	100	36.6	B1
DAM002	Damara	100	45	B1
DAM003	Damara	97.7	6.2	B1
DAM004	Damara	100	20.5	B1
DAM005	Damara	100	56.9	B1
DAM006	Damara	100	100.5	B1
DAM007	Damara	100	44.3	B1
DAM008	Damara	100	82.4	B1
DAM009	Damara	100	550.8	B1
DAM010	Damara	100	37.3	B1
DAM011	Damara	100	60.1	B1
DAM012	Damara	100	62.6	B1
DAM013	Damara	100	18.3	B1
DAM014	Damara	100	62	B1
DAM015	Damara	100	24.9	B1
DAM016	Damara	100	30.5	B1
DAM017	Damara	100	71.6	B1
DAM018	Damara	100	67.3	B1
DAM019	Damara	100	22.2	B1
DAM020	Damara	100	47.8	B1
DAM021	Damara	100	34.3	B1
DAM022	Damara	100	55.7	B1
DAM023	Damara	100	41.1	B1
DAM024	Damara	100	24.1	B1
DAM025	Damara	100	44.6	A1b
DAM026	Damara	100	24.3	A1b
DAM027	Damara	100	159.9	A1b
DAM028	Damara	100	480.4	A1b
DAM029	Damara	100	207.5	A1b
DAM030	Damara	100	115.4	A1b
DAM031	Damara	100	18.1	A1b
DAM032	Damara	100	53.6	A1b
NA001	Namaqua	100	68.4	A1b
NA002	Namaqua	100	100	A1b
NA003	Namaqua	100	37.9	B1
NA004	Namaqua	100	78.8	B1
NA005	Namaqua	100	44.8	B1
NA006	Namaqua	100	185.6	A1b
NA007	Namaqua	100	56.3	B1
NA008	Namaqua	100	258.6	B1
NA009	Namaqua	100	153.4	B1
NA010	Namaqua	100	37.6	B1
NA011	Namaqua	100	117.6	A1b
NA012	Namaqua	100	437.3	B1
NA013	Namaqua	100	242.1	B1
NA014	Namaqua	100	408.8	B1
NA015	Namaqua	100	995.8	B1
RON001	Ronderib	100	74.5	A1b
RON002	Ronderib	100	1123.9	B1
RON004	Ronderib	90.8	3.4	B1
RON005	Ronderib	99.4	6.3	B1
RON006	Ronderib	91.4	3.2	B1
RON007	Ronderib	98.2	5.7	B1
RON008	Ronderib	98.4	6.4	B1
RON009	Ronderib	95.2	4.3	B1

## Sheet: Ancient Sheep
Sample	%coverage	average depth	Haplogroup	N Raw Fastq reads	Read mapping to Sheep mtDNA	Deduplicated reads	MapDamage score
DK-10	100	45	B1	73937056	56976052	16712	0.15
DK1-13	100	27.2	B1	25738619	24009847	7175	0.15
DK1-14	100	189.9	B1	44556660	34916173	65787	0.2
DK1-16	100	661.5	B1	92546273	80400061	200885	0.11
DK1-25	67.9	2.4	B1	10178806	8417976	712	NA
DK1-53	10.3	0.1	No coverage	165354	20072	44	NA
DK1-54	96.7	6.8	B1	18974377	17698349	1706	0.12

## Sheet: Diversity Stats
SHEEP
		n	Nucleotide diversity	Haplotype Diversity	Reference
Dam	ALL	31	0.00261686	0.997849	This study
	A	8	0.000963101	1	This study
	B	23	0.000841328	0.996047	This study
Na	ALL	12	0.00252109	0.961905	This study
	A	4	0.00095716	1	This study
	B	8	0.000591961	0.927273	This study
Ron	ALL	2	0.00257235	1	This study
	A	1	NA	NA	This study
	B	4	0.000521759	1	This study
DK1 ancient sheep	B	4	0.000732976	1	This study
Turkey	A	70	0.0039	0.975	Demirci et al 2013
	B	88	0.0055	0.987
	C	69	0.0029	0.947
	D	2	0.0057	1
	E	11	0.0065	0.964
CATTLE
South Africa		35	0.00075		Horsburgh et al 2013
Ethiopia		170	0.00082		Bonfiglio et al 2012
Egypt		26	0.00094		Bonfiglio et al 2012

## Sheet: Sequences used in Tree
Genbank Accession	Lineage	Breed	Origin	Region	Reference
MT768063	B	Rahmani	Egypt	Africa	Deng et al 2020
MT768064	B	Sahelian	Burkina Faso	Africa	Deng et al 2020
MT768066	A1a	Barki	Egypt	Africa	Deng et al 2020
MT768067	B	Ossimi sheep	Egypt	Africa	Deng et al 2020
MT768068	B	Ossimi sheep	Egypt	Africa	Deng et al 2020
MT768070	B	Rahmani	Egypt	Africa	Deng et al 2020
MT768071	B	Sahelian	Burkina Faso	Africa	Deng et al 2020
MT768076	B	Mossi	Burkina Faso	Africa	Deng et al 2020
MT768077	B	Mossi	Burkina Faso	Africa	Deng et al 2020
MT768078	B	Barki	Egypt	Africa	Deng et al 2020
MT768079	B	Barki	Egypt	Africa	Deng et al 2020
MT768080	B	Djallonke	Burkina Faso	Africa	Deng et al 2020
MT768152	B	Libyan Barbary	Libya	Africa	Deng et al 2020
MT768194	B	Mbororo	Niger	Africa	Deng et al 2020
MT768195	B	Mbororo	Niger	Africa	Deng et al 2020
MT768226	B	Djallonke	Chad	Africa	Deng et al 2020
MT768227	B	Djallonke	Chad	Africa	Deng et al 2020
MT768072	B	Shetland	Scotland	Europe	Deng et al 2020
MT768081	B	Altamurana	Italy	Europe	Deng et al 2020
MT768082	B	Altamurana	Italy	Europe	Deng et al 2020
MT768096	B	Bentheimer	Germany	Europe	Deng et al 2020
MT768112	B	Drente Heathen	Netherlands	Europe	Deng et al 2020
MT768113	B	Drente Heathen	Netherlands	Europe	Deng et al 2020
MT768114	B	Drente Heathen	Netherlands	Europe	Deng et al 2020
MT768115	B	Drente Heathen	Netherlands	Europe	Deng et al 2020
MT768116	B	Drente Heathen	Netherlands	Europe	Deng et al 2020
MT768118	B	Gotland	Sweden	Europe	Deng et al 2020
MT768119	B	Gotland	Sweden	Europe	Deng et al 2020
MT768120	B	Gotland	Sweden	Europe	Deng et al 2020
MT768121	B	Gotland	Sweden	Europe	Deng et al 2020
MT768122	B	Hampshire	England	Europe	Deng et al 2020
MT768142	A1a	Romney	England	Europe	Deng et al 2020
MT768153	B	Leccese	Italy	Europe	Deng et al 2020
MT768154	B	Leccese	Italy	Europe	Deng et al 2020
MT768155	B	North Ronaldsay	Scotland	Europe	Deng et al 2020
MT768165	B	feral sheep	Norway	Europe	Deng et al 2020
MT768166	B	Old Spael	Norway	Europe	Deng et al 2020
MT768167	B	Old Spael	Norway	Europe	Deng et al 2020
MT768168	B	Old Spael	Norway	Europe	Deng et al 2020
MT768169	B	feral sheep	Norway	Europe	Deng et al 2020
MT768170	B	feral sheep	Norway	Europe	Deng et al 2020
MT768171	B	Grey Tronder	Norway	Europe	Deng et al 2020
MT768172	B	Norwegian White	Norway	Europe	Deng et al 2020
MT768173	B	Norwegian White	Norway	Europe	Deng et al 2020
MT768174	B	Norwegian White	Norway	Europe	Deng et al 2020
MT768175	B	Helsinge	Sweden	Europe	Deng et al 2020
MT768178	B	Olkuska	Poland	Europe	Deng et al 2020
MT768180	B	Ouessant	France	Europe	Deng et al 2020
MT768181	B	Pag Island	Croatia	Europe	Deng et al 2020
MT768182	B	Pag Island	Croatia	Europe	Deng et al 2020
MT768183	B	Pag Island	Croatia	Europe	Deng et al 2020
MT768184	A1a	Pramenka	Serbia	Europe	Deng et al 2020
MT768185	A1a	Pramenka	Serbia	Europe	Deng et al 2020
MT768187	A1a	Rhoen	Germany	Europe	Deng et al 2020
MT768188	B	Rhoen	Germany	Europe	Deng et al 2020
MT768189	B	Rhoen	Germany	Europe	Deng et al 2020
MT768190	B	Ripollesa	Spain	Europe	Deng et al 2020
MT768191	B	Sumavska	Czech Republic	Europe	Deng et al 2020
MT768197	B	Shetland	Scotland	Europe	Deng et al 2020
MT768198	B	Shetland	Scotland	Europe	Deng et al 2020
MT768199	B	Dalmatian	Croatia	Europe	Deng et al 2020
MT768200	B	Dalmatian	Croatia	Europe	Deng et al 2020
MT768201	B	Solognote	France	Europe	Deng et al 2020
MT768202	B	Solognote	France	Europe	Deng et al 2020
MT768203	B	Solognote	France	Europe	Deng et al 2020
MT768214	B	Texel	Netherlands	Europe	Deng et al 2020
MT768215	B	Texel	Netherlands	Europe	Deng et al 2020
MT768216	B	Texel	Netherlands	Europe	Deng et al 2020
MT768224	B	Valachian	Czech Republic	Europe	Deng et al 2020
MT768225	B	Valachian	Czech Republic	Europe	Deng et al 2020
MT768228	B	White Mountain sheep	Germany	Europe	Deng et al 2020
MT768241	A1a	Zwartbles	Netherlands	Europe	Deng et al 2020
MT768098	B	Bozakh	Iran	West Asia	Deng et al 2020
MT768099	A1a	Bozakh	Iran	West Asia	Deng et al 2020
MT768125	A1a	Grey Shiraz	Iran	West Asia	Deng et al 2020
MT768127	A1a	Ghezel	Iran	West Asia	Deng et al 2020
MT768129	A1a	Afshari	Iran	West Asia	Deng et al 2020
MT768130	B	Shal	Iran	West Asia	Deng et al 2020
MT768131	A1a	Shal	Iran	West Asia	Deng et al 2020
MT768132	A1a	Shal	Iran	West Asia	Deng et al 2020
MT768133	A1a	Shal	Iran	West Asia	Deng et al 2020
MT768135	A1a	Baluchi	Iran	West Asia	Deng et al 2020
MT768137	B		Iran	West Asia	Deng et al 2020
MT768138	A1a		Iran	West Asia	Deng et al 2020
MT768139	A1a		Iran	West Asia	Deng et al 2020
MT768140	B		Iran	West Asia	Deng et al 2020
MT768156	B	Makui	Iran	West Asia	Deng et al 2020
MT768160	B	Moghani	Iran	West Asia	Deng et al 2020
MT768161	B	Moghani	Iran	West Asia	Deng et al 2020
KF938339	B1a	Baidarak	Buryatia, Russiaa		This study
KF938359	B1a	Oxford Down	The United Kingdomb		This study
KF938341	B1a	Udmurtian local	Udmurtia, Russiab		This study
KF938342	A1a	Åland	Åland, Finlandb		This study
KF938343	B1a	Tushin	South-Caucasian, Russiaa		This study
KF938344	B1a	Mazekh	South-Caucasian, Azerbaijana		This study
KF938345	A1a	Gala	South-Caucasian, Azerbaijana		This study
KF938346	B1a	Kuibyshev	Volga Region, Russiaa		This study
KF938340	B1a	Andi	North Caucasian, Russiaa		This study
KF938347	B1a	Pramenka	Southeast Europe, Serbiaa		This study
KF938348	B1a	Karakul	Southeast Europe, Moldovaa		This study
KF938349	B1a	Swiniarka	Polanda		This study
KF938350	B1a	Wrzosowka	Polanda		This study
KF938351	B1a	Karachai	North Caucasian, Russiaa		This study
KF938352	B1a	Oparin	Volga Region, Russiaa		This study
KF938353	B1a	Kainuu grey	Finlanda		This study
KF938354	B1a	Finnsheep	Finlanda		This study
KF938355	B1a	Finnsheep	Finlanda		This study
KF938356	B1a	Viena	Karelia, Russiab		This study
KF938357	B1a	Carpathian Mountain	Ukrainea		This study
KF938358	B1a	Kulunda	Altai, Russiaa		This study
KF938321	A1b	Baerchuke	Bachu County, Xingjiang, Chinac		This study
KF938330	A1a	Bashbay	Yumin County, Xingjiang, Chinac		This study
KF938331	A1a	Bayinbuluke	Bayinbuluk County, Xingjiang, Chinac		This study
KF938332	A1a	Duolang	Shache County, Xingjiang, Chinac		This study
KF938333	B1b	Kazakh	Tekes County, Xingjiang, Chinac		This study
KF938322	A1b	Hetian	Lopu County, Xingjiang, Chinac		This study
KF938334	A2	Kirghiz	Shache County, Xingjiang, Chinac		This study
KF938335	B2	Lanzhou Large-tailed	Lanzhou, Gansu, Chinac		This study
KF938323	A1b	Lop Nor	Yuli County, Xingjiang, Chinac		This study
KF938336	A1a	Tan	Yanchi County, Ningxia, Chinac		This study
KF938324	A1b	Turfan Black	Tuokexun County, Xingjiang, Chinac		This study
KF938337	A1a	Tashkurgan	Taxorgan Country, Xingjiang, Chinac		This study
KF938338	A1a	Yecheng	Yecheng Country, Xingjiang, Chinac		This study
KF938317	A1a	Sunite	Sonid Zuoqi, Inner Mongolia, Chinac		This study
KF938325	A2	Qinhai Tibetan	Haixi Country, Qinhai, Chinac		This study
KF938326	A1a	Qira Black	Qira Country, Xingjiang, Chinac		This study
KF938328	B1a	Jingzhong	Jinzhong, Shanxi, Chinac		This study
KF938329	B1a	Hanzhong	Hanzhong, Shaanxi, Chinac		This study
KF938319	A1b	Ujimqin	Xilingguole, Inner Mongolia,Chinac		This study
HM236176	B1a	Karakas	Turkeyc		Meadows et al. (2011)
HM236177	B1a	Karakas	Turkeyc		Meadows et al. (2011)
KF938360	B1a	Ovis orientalis	Kazakhstanc		This study
KF302440	A1a	Comisana	Sicily Italyc		Lancioni et al. (2013)
KF302441	A1a	Comisana	Sicily Italyc		Lancioni et al. (2013)
KF302442	A1a	Comisana	Sicily Italyc		Lancioni et al. (2013)
KF302443	A1a	Comisana	Sicily Italyc		Lancioni et al. (2013)
KF302444	A1a	Comisana	Sicily Italyc		Lancioni et al. (2013)
KF302445	A1a	Comisana	Sicily Italyc		Lancioni et al. (2013)
KF302446	A1a	Merinizzata Italiana	Centre-South, Italyc		Lancioni et al. (2013)
KF302447	B1a	Lancaune	Roquefort, Francec		Lancioni et al. (2013)
KF302448	B1a	Gentile di Puglia	South, Italyc		Lancioni et al. (2013)
KF302449	B1a	Sopravissana	Centre, Italyc		Lancioni et al. (2013)
KF302450	B1a	Appenninica	Centre, Italyc		Lancioni et al. (2013)
KF302451	B1a	Appenninica	Centre, Italyc		Lancioni et al. (2013)
KF302452	B1a	Comisana	Sicily Italyc		Lancioni et al. (2013)
KF302453	B1a	Lacaune	Roquefort, Francec		Lancioni et al. (2013)
KF302454	B1a	Sopravissana	Centre, Italyc		Lancioni et al. (2013)
KF302455	B1a	Gentile di Puglia	South, Italyc		Lancioni et al. (2013)
KF302456	B1a	Sopravissana	Centre, Italyc		Lancioni et al. (2013)
KF302457	B1a	Gentile di Puglia	South, Italyc		Lancioni et al. (2013)
KF302458	B1a	Sopravissana	Centre, Italyc		Lancioni et al. (2013)
KF302459	B1a	Merinizzata Italiana	Centre-South, Italyc		Lancioni et al. (2013)
KF302460	B1a	Lancaune	Roquefort, Francec		Lancioni et al. (2013)
KF302461	B1a	Comisana	Sicily Italyc		Lancioni et al. (2013)
KF302462	B1a	Comisana	Sicily Italyc		Lancioni et al. (2013)
KF977845	B1a	Djallonke	N.A.e		Unpublished
KF977846	B1a	Sahelian	N.A.e		Unpublished
KF977847	A1a	Small-tailed han	N.A.e		Unpublished
EF490451	B1a	Finn Dorset	N.A.e		Burgstaller et al. 2007
EF490452	B1a	Finn Dorset	N.A.e		Burgstaller et al. 2007
EF490453	B1a	Finn Dorset	N.A.e		Burgstaller et al. 2007
EF490454	B1a	Finn Dorset	N.A.e		Burgstaller et al. 2007
EF490455	B1a	Finn Dorset	N.A.e		Burgstaller et al. 2007
EF490456	B1a	Finn Dorset	N.A.e		Burgstaller et al. 2007
HM236174	A1a	Merino	Australiac		Meadows et al. 2011
HM236175	A1a	Merino	Australiac		Meadows et al. 2011
